# Supplementary material for: Betel nut chewing, oral premalignant lesions, and the oral microbiome
Source: PubMed Central journal article supplement (PMC5321455; doi:10.1371/journal.pone.0172196), 2017-02-22
Supplement: pone.0172196.s001.pdf [file pone.0172196.s001.pdf]

### DEMOGRAPHIC INFORMATION

ID # \_\_\_\_\_ Date \_\_\_\_\_ Interviewer Initials \_\_\_\_\_

Date of Birth: \_\_\_\_\_ Age: \_\_\_\_\_

Gender:  Male  Female Island/Country of birth: \_\_\_\_\_

How many total years of your life have you lived on Guam or Saipan? \_\_\_\_\_ Years

Identify your ethnic background by indicating the percentage in the space provided below. The total overall should equal 100% when complete.

|                               | % |                          | % |
|-------------------------------|---|--------------------------|---|
| Chamorro (Guam)               |   | Pohnpeian                |   |
| Chamorro (CNMI)               |   | Pohnpeian (outer island) |   |
| Carolinian (Caroline Islands) |   | Yapese                   |   |
| Chuukese                      |   | Yapese (outer island)    |   |
| Chuukese (outer island)       |   | Filipino                 |   |
| Kosraean                      |   | Other (specify):         |   |
| Kosraean (outer island)       |   |                          |   |
| Marshallese                   |   |                          |   |
| Palauan                       |   |                          |   |

**TOTAL %** \_\_\_\_\_

Which **ONE** ethnic group that you most identify with? \_\_\_\_\_

What is your annual household income?

- |                                                       |                                                       |
|-------------------------------------------------------|-------------------------------------------------------|
| <input type="checkbox"/> Less than \$10,000           | <input type="checkbox"/> Between \$40,000 to \$50,000 |
| <input type="checkbox"/> Between \$10,000 to \$20,000 | <input type="checkbox"/> Between \$60,000 to \$70,000 |
| <input type="checkbox"/> Between \$20,000 to \$30,000 | <input type="checkbox"/> \$70,000 or more             |
| <input type="checkbox"/> Between \$30,000 to \$40,000 |                                                       |

What is the highest education level you have completed?

- |                                                  |                                                                    |
|--------------------------------------------------|--------------------------------------------------------------------|
| <input type="checkbox"/> Elementary school (K-5) | <input type="checkbox"/> 4-year College Degree (bachelor's degree) |
| <input type="checkbox"/> Middle School (6-8)     | <input type="checkbox"/> Some Graduate School                      |
| <input type="checkbox"/> High School (9-12)      | <input type="checkbox"/> Graduate Degree (MS, PhD, MD, JD)         |
| <input type="checkbox"/> Some college            |                                                                    |

Marital Status:  Single  Separated  
 Married  Widowed  
 Divorced

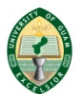

# PERSONAL MEDICAL HISTORY

U54 University of Guam/Cancer Research Center of Hawaii Partnership  
*PILOT PROJECT 4: "Oral Microbiome Project"*

## PERSONAL MEDICAL HISTORY

ID # \_\_\_\_\_

Date \_\_\_\_\_

Interviewer Initials \_\_\_\_\_

| Has a medical doctor ever told you that you had/have... (Please circle answer) | If yes, what kind? (Please circle) | If yes, how old were you when you were first told you had... | Do/Did either of you parents have... (Please circle answer) |
|--------------------------------------------------------------------------------|------------------------------------|--------------------------------------------------------------|-------------------------------------------------------------|
| <b>1. Diabetes?</b> Yes    No                                                  | Type 1    Type 2    Gestational    | _____ years                                                  | Yes    No<br>If yes: Mom ____ Dad ____                      |
|                                                                                |                                    |                                                              |                                                             |
| <b>2. Heart attack?</b><br><br>Yes    No                                       |                                    | _____ years                                                  | Yes    No<br>If yes: Mom ____ Dad ____                      |
|                                                                                |                                    |                                                              |                                                             |
| <b>3. Stroke?</b><br><br>Yes    No                                             |                                    | _____ years                                                  | Yes    No<br>If yes: Mom ____ Dad ____                      |
|                                                                                |                                    |                                                              |                                                             |
| <b>4. Hypertension? (High Blood Pressure)</b><br><br>Yes    No                 |                                    | _____ years                                                  | Yes    No<br>If yes: Mom ____ Dad ____                      |

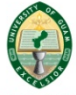

UNIVERSITY OF GUAM  
UNIBETSEDAT GUAHAN  
Cancer Research Center

**U54 University of Guam/Cancer Research Center of Hawaii Partnership**  
*PILOT PROJECT 4: "Oral Microbiome Project"*

---

ORAL HEALTH BEHAVIOR QUESTIONNAIRE

ID # \_\_\_\_\_ Date \_\_\_\_\_ Interviewer Initials \_\_\_\_\_

BETEL NUT

1. Have you ever chewed betel nut in your life?

- 1 Yes
- 2 No [Go to 17]
- 7 Don't know/Not sure [Go to 17]
- 9 Refused [Go to 17]

2. Do you now chew betel nut?

- 1 Yes
- 2 No
- 7 Don't know/Not sure [Go to 17]
- 9 Refused [Go to 17]

3. How often (do/did) you chew betel nut?

- 1 Daily
- 2 Weekly
- 3 Monthly
- 7 Don't know/Not sure [Go to 5]
- 9 Refused [Go to 5]

4. How many times per day, week, or month (do/did) you chew betel nut?

- \_\_\_\_\_ times
- 7 Don't know/Not sure
  - 9 Refused

5. (Do/Did) you include lime when chewing betel nut?

- 1 Yes
- 2 No [Go to 7]
- 7 Don't know/Not sure [Go to 7]
- 9 Refused [Go to 7]

6. How (do/did) you obtain your lime?

- 1 Homemade (Complete Lime Recipe Form)
- 2 Store (Identify store: \_\_\_\_\_)

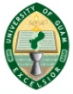

- 3 Family/friend
- 7 Don't know/Not sure
- 9 Refused

7. (Do/Did) you include tobacco when chewing betel nut? (See Tobacco Guide for type.)

- 1 Yes (Identify type: \_\_\_\_\_)
- 2 No
- 7 Don't know/Not sure
- 9 Refused

8. (Do/Did) you include *pupulu* or pepper leaf when chewing betel nut?

- 1 Yes
- 2 No
- 7 Don't know/Not sure
- 9 Refused

9. What variety of betel nut (do/did) you most often chew?

- 1 Red
- 2 White
- 7 Don't know/Not sure
- 9 Refused

10. What stage of betel nut (do/did) you most often chew?

- 1 Young (unripe)
- 2 Mature (ripe)
- 7 Don't know/Not sure
- 9 Refused

11. (Do/Did) you add alcohol to any of the components of your chew (nut, leaf, lime or tobacco)?

- 1 Yes
- 2 No
- 7 Don't know/Not sure
- 9 Refused

12. (When you [chew/chewed] betel nut) How long do you keep the chew (nut) in your mouth?

- \_\_\_\_\_ minutes
- 7 Don't know/Not sure
- 9 Refused

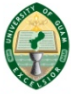

13. When you [sleep/slept] at night, (do/did) you keep the chew (nut) in your mouth?

- 1 Yes
- 2 No
- 7 Don't know/Not sure
- 9 Refused

14. (Do/Did) you ever ingest (swallow) your chew?

- 1 Yes
- 2 No **[Go to 16]**
- 7 Don't know/Not sure **[Go to 16]**
- 9 Refused **[Go to 16]**

15. How often (do/did) you ingest (swallow) your chew?

- 1 Sometimes
- 2 Most of the times
- 3 All the time
- 7 Don't know/Not sure
- 9 Refused

16. How long have you been chewing betel nut?

- \_\_\_\_\_ years
- 7 Don't know/Not sure
- 9 Refused

#### SMOKELESS TOBACCO

17. Aside from adding tobacco to a betel quid, how often do you use smokeless tobacco?

- 1 Everyday
- 2 Somedays
- 3 Not at all
- 7 Don't know/Not sure
- 9 Refused

#### CIGARETTE SMOKING

18. Do you smoke cigarettes at least once per day?

- 1 Yes
- 2 No **[Go to 20]**

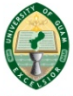

- 7 Don't know/Not sure **[Go to 20]**
- 9 Refused **[Go to 20]**

19. How many sticks do you smoke daily?

- \_\_\_\_\_ sticks
- 7 Don't know/Not sure
- 9 Refused

**ALCOHOL**

20. Did you drink alcohol within the past 30 days?

- 1 Yes
- 2 No **[Go to 23]**
- 7 Don't know/Not sure **[Go to 23]**
- 9 Refused **[Go to 23]**

21. During the past 30 days, on the days when you drank, about how many drinks did you drink? [Refer to Alcohol Guide for types and size.]

\_\_\_\_\_ TOTAL UNITS

- \_\_\_\_\_ cans of beer
- \_\_\_\_\_ bottles of beer
- \_\_\_\_\_ cups tuba/kava
- \_\_\_\_\_ glasses of mixed drink
- \_\_\_\_\_ glasses of wine
- \_\_\_\_\_ shots of liquor

- 7 Don't know/Not sure
- 9 Refused

22. During the past 30 days, what is the largest number of drinks you had on any occasion?

\_\_\_\_\_ TOTAL UNITS

- \_\_\_\_\_ cans of beer
- \_\_\_\_\_ bottles of beer



\_\_\_\_\_ cups tuba/kava  
\_\_\_\_\_ glasses of mixed drink  
\_\_\_\_\_ glasses of wine  
\_\_\_\_\_ shots of liquor

7 Don't know/Not sure  
9 Refused

ORAL CARE

23. Have you ever been told by a dentist or doctor that you have cancer of the mouth?

1 Yes  
2 No  
7 Don't know/Not sure  
9 Refused

24. How often do you brush your teeth?

1 More than once per day  
2 Once per day  
3 Once per week  
4 Once per year  
5 Never  
7 Don't know/Not sure  
9 Refused

25. Do you use the husk of the betel nut for cleaning your teeth?

1 Yes  
2 No  
7 Don't know/Not sure  
9 Refused

26. Do you visit your dentist at least once a year?

1 Yes  
2 No  
7 Don't know/Not sure [End]  
9 Refused [End]



### Medication and Sexual History

ID # \_\_\_\_\_ Date \_\_\_\_\_ Interviewer Initials \_\_\_\_\_

Interviewer will start by stating:

*Sexual history influences HPV status, and thus is a risk factor for oral cancer. The questions below will help researchers better understand this risk in betel nut chewers.*

1. Within the past 6 months, have you taken antibiotics?     YES     NO

2. Within the past 6 months, have you taken any of the following medications at least 2 times per week for 1 month or longer? (check all that apply)

- aspirin (e.g., Bayer, Bufferin, Excedrin)
- ibuprofen (e.g., Advil, Motrin, Nuprin)
- Naproxen (e.g., Aleve)
- prescription pain medication
- Other NSAIDS
- acetaminophen (e.g., Tylenol)

3. Have you ever been diagnosed with a sexually transmitted infection?  
 YES     NO

If yes, please describe: \_\_\_\_\_

4. (Females only) Have you ever had an abnormal Pap smear?  
 YES     NO

5. Have you ever had sexual contact with a male?    YES    NO (if NO, skip to question #10)

6. How many different males have you had sexual contact with over your lifetime? \_\_\_\_\_

7. What type of sexual contact have you had with a male? (check all that apply)

- Vaginal intercourse
- Anal intercourse
- Oral (received oral sex)
- Oral (performed oral sex)
- Other (describe) \_\_\_\_\_

8. Have you had sexual contact with a male within the past 3 months? YES    NO (if NO, skip to question #10)

9. What type of sexual contact have you had with a male within the past 3 months? (check all that apply)

- Vaginal intercourse
- Anal intercourse
- Oral (received oral sex)
- Oral (performed oral sex)
- Other (describe)\_\_\_\_\_

10. Have you ever had sexual contact with a female? YES NO (if NO, skip to END)

11. What type of sexual contact have you had with a female? (check all that apply)

- Vaginal intercourse
- Anal intercourse
- Oral (received oral sex)
- Oral (performed oral sex)
- Other (describe)\_\_\_\_\_

12. Have you had sexual contact with a female within the past 3 months? YES NO (if NO, skip to END)

13. What type of sexual contact have you had with a female within the past 3 months? (check all that apply)

- Vaginal intercourse
- Anal intercourse
- Oral (received oral sex)
- Oral (performed oral sex)
- Other (describe)\_\_\_\_\_

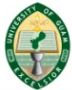

### Physical Assessment

ID # \_\_\_\_\_ Date \_\_\_\_\_ Screener Initials \_\_\_\_\_

*Before you begin, be sure that the individual has not eaten or drank any beverage for at least an hour. Also, ensure that the individual has rid him/herself of wallets, watches, jewelry, or any other material that may skew results.*

|                                                                                                                                                                                   | TRIAL 1   | TRIAL 2   | TRIAL 3   | AVERAGE   |
|-----------------------------------------------------------------------------------------------------------------------------------------------------------------------------------|-----------|-----------|-----------|-----------|
| WEIGHT (lbs.)                                                                                                                                                                     |           |           |           |           |
| HEIGHT (in.)                                                                                                                                                                      |           |           |           |           |
| BLOOD PRESSURE (mmHg)*                                                                                                                                                            | ____/____ | ____/____ | ____/____ | ____/____ |
| * Normal Blood Pressure would be about 120/70. High Blood Pressure is when the diastolic number is above 80mmHg. Low Blood Pressure is when the diastolic number is below 60mmHg. |           |           |           |           |

### BODY MASS INDEX (BMI):

$$BMI = 703 \times \frac{\text{Weight (lbs.)}}{\text{Height}^2 \text{ (in.)}}$$

$$BMI = 703 \times \left( \frac{\quad}{\quad} \right) =$$

|               |           |
|---------------|-----------|
| Under Weight  | <18.5     |
| Normal Weight | 18.5-24.9 |
| Over Weight   | 25-29.9   |
| Obesity       | 30<       |

### BLOOD PRESSURE:

|        | Systolic | Diastolic |
|--------|----------|-----------|
| Low    |          | <60 mmHg  |
| Normal | 120 mmHg | 70 mmHg   |
| High   |          | >80 mmHg  |
